# Supplementary material for: Highly efficient iodine uptake and iodate selective probe in a 3D honeycomb-like copper–organic framework based on in situ ligand transformation
Source: Royal Society of Chemistry journal article supplement (doi:10.1039/d3ce01169k), 2023-12-21
Supplement: d3ce01169k1.pdf [file d3ce01169k1.pdf]

*Electronic Supporting Information for:*

# Highly Efficient Iodine Uptake and Iodate Selective Probe in A 3D Honeycomb-Like Copper-Organic Framework Based On *In Situ* Ligand Transformation

Wen Dai,\* Chuanming Zhang, Xiaoang Yang, and Lincai Li

*State Key Laboratory of Physical Chemistry of Solid Surface, College of Chemistry and Chemical Engineering, Xiamen University, Xiamen, Fujian 361005, China. E-mail: [daiwen95@stu.xmu.edu.cn](mailto:daiwen95@stu.xmu.edu.cn)*

## Contents

Scheme S1. Synthetic route for N'-bis(4-aminopyridine)phenylenediimide

Table S1-S2. Crystallographic data

Table S3. Comparison of I<sub>2</sub> vapor adsorption in different MOFs materials

Figure S1. <sup>1</sup>H NMR spectrum

Figure S2. IR spectra

Figure S3. ESI-MS data

Figure S4. PXRD spectra

Figure S5. TGA traces

Figure S6. Solid state UV-Vis spectra

Figure S7. Solid-state fluorescent spectra

Figure S8. Optical diffuse reflectance spectra

Figure S9. The cyclic voltammograms spectra

Figure S10. The N<sub>2</sub> adsorption-desorption isotherms and porosity feature of **1**

Figure S11. Solid-state circular dichroism spectrum

Figure S12. PXRD patterns of compound **1** in varied conditions

Figure S13. Photoluminescence spectra of compound **1** used for special IO<sub>3</sub><sup>-</sup> recognition.

References S1-S13

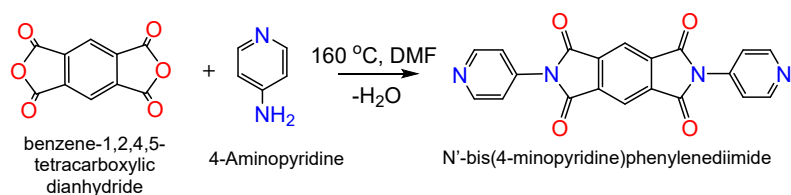

**Scheme S1.** Synthetic route for N'-bis(4-aminopyridine)phenylenediimide.

**Table S1.** Crystal data collections and structure refinement parameters for **1**

| Compound                                                   | (CCDC2164832)                                                    |
|------------------------------------------------------------|------------------------------------------------------------------|
| Empirical formula                                          | C <sub>20</sub> H <sub>18</sub> N <sub>4</sub> O <sub>9</sub> Cu |
| Formula weight                                             | 521.92                                                           |
| Crystal size (mm)                                          | 0.15×0.03×0.01                                                   |
| Crystal system                                             | Hexagonal                                                        |
| Space group, Z                                             | P6 <sub>5</sub> 22, 6                                            |
| a (Å) ; α (°)                                              | 18.8181(8); 90                                                   |
| b (Å) ; β (°)                                              | 18.8181(8); 90                                                   |
| c (Å) ; γ (°)                                              | 23.6351(7); 120                                                  |
| V (Å <sup>3</sup> )                                        | 7248.4(7)                                                        |
| ρ <sub>calcd</sub> (g·cm <sup>-3</sup> )                   | 0.717                                                            |
| μ (mm <sup>-1</sup> )                                      | 0.886                                                            |
| F(000)                                                     | 1602                                                             |
| λ (Cu-Kα) (Å)                                              | 1.54178                                                          |
| T (°K)                                                     | 150.0(1)                                                         |
| 2θ Range (°)                                               | 6.588 – 145.466                                                  |
| Collected reflections                                      | 18325                                                            |
| Unique reflections                                         | 4728                                                             |
| Observed reflections                                       | 3860 (>2σ (I))                                                   |
| R <sub>int</sub>                                           | 0.0516                                                           |
| GOF                                                        | 1.071                                                            |
| Flack parameter                                            | 0.14(6)                                                          |
| R indices (for obs.):                                      |                                                                  |
| R <sub>1</sub> <sup>a</sup> , wR <sub>2</sub> <sup>b</sup> | 0.0527, 0.1432                                                   |
| R indices (for all):                                       |                                                                  |
| R <sub>1</sub> , wR <sub>2</sub>                           | 0.0649, 0.1527                                                   |
| Largest diff. peak/hole (e.Å <sup>-3</sup> )               | 0.46/-0.34                                                       |

$${}^a R_1 = \sum(|F_o| - |F_c|) / \sum|F_o|, wR_2 = \{\sum w[(F_o^2 - F_c^2)^2] / \sum w[(F_o^2)^2]\}^{1/2};$$

$${}^b w = 1 / [\sigma^2(F_o^2) + (aP)^2 + bP], \text{ where } P = (F_o^2 + 2F_c^2) / 3.$$

**Table S2.** Selected bond lengths [Å] and angles [°] for **1**.

|             |           |             |           |
|-------------|-----------|-------------|-----------|
| Cu1-O2a     | 1.975(3)  | Cu1-O1a     | 2.810(3)  |
| Cu1-O2b     | 1.975(3)  | Cu1-N2      | 1.985(3)  |
| Cu1-O4      | 2.351(5)  | Cu1-N2c     | 1.985(3)  |
| O2a-Cu1-O2b | 174.9(2)  | O2b-Cu1-N2  | 90.21(13) |
| O2a-Cu1-O4  | 92.53(11) | O2b-Cu1-N2c | 89.65(13) |
| O2b-Cu1-O4  | 92.53(11) | O4-Cu1-N2   | 91.60(11) |
| O2a-Cu1-N2  | 89.65(13) | O4-Cu1-N2c  | 91.60(11) |
| O2a-Cu1-N2c | 90.21(13) | N2-Cu1-N2c  | 176.8(2)  |

Key: a = 1-y+x, x, -1/6+z; b = 2-x, 1-x+y, 4/3-z; c = 2-y, 2-x, 7/6-z.

**Table S3.** Comparison of I<sub>2</sub> vapor adsorption in different MOFs materials.

| Compound                                                            | I <sub>2</sub> adsorption capacity (mg·g <sup>-1</sup> ) | Ref.             |
|---------------------------------------------------------------------|----------------------------------------------------------|------------------|
| <b>Zr<sub>6</sub>O<sub>4</sub>(OH)<sub>4</sub>(peb)<sub>6</sub></b> | 2790                                                     | S1               |
| <b>Zn<sub>2</sub>(tptc)(apy)<sub>2-x</sub></b>                      | 2160                                                     | S2               |
| <b>CuBTC</b>                                                        | 1750                                                     | S3               |
| <b>(ZnI<sub>2</sub>)<sub>3</sub>(tpt)<sub>2</sub></b>               | 1730                                                     | S4               |
| <b>MFM-300(Sc)</b>                                                  | 1540                                                     | S5               |
| <b>UiO-66-PYDC</b>                                                  | 1250                                                     | S6               |
| <b>ZIF-8</b>                                                        | 1250                                                     | S7               |
| <b>Ni<sub>4</sub>(44pba)<sub>8</sub></b>                            | 1100                                                     | S8               |
| <b>Cu(INA)<sub>2</sub></b>                                          | 900                                                      | S9               |
| <b>TMBP-CuI</b>                                                     | 750                                                      | S10              |
| <b>Ni(pz)Ni(CN)<sub>4</sub></b>                                     | 590                                                      | S11              |
| <b>Cu<sub>3</sub>BTC<sub>2</sub>(TIB)<sub>2</sub></b>               | 286                                                      | S12              |
| <b>Co<sub>3</sub>BTC<sub>2</sub>(TIB)<sub>2</sub></b>               | 279                                                      | S12              |
| <b>SION-8:Ca<sub>2</sub>(TBAPy)</b>                                 | 250                                                      | S13              |
| <b>[Cu(L)(H<sub>2</sub>O)]·2H<sub>2</sub>O</b>                      | 3410                                                     | <i>This work</i> |

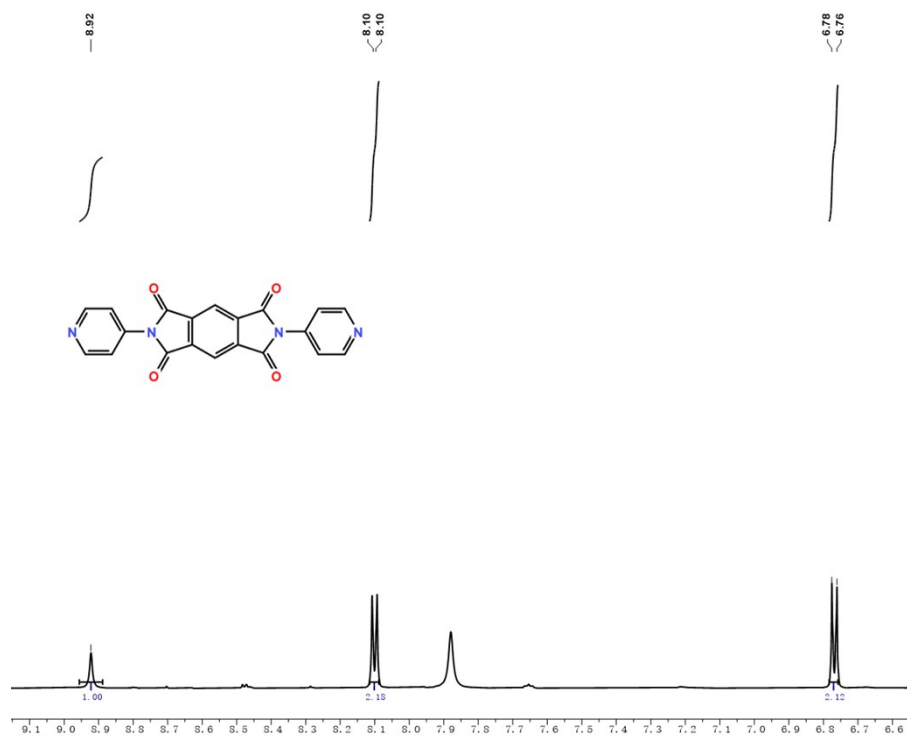

**Figure S1.**  $^1\text{H}$  NMR spectra of  $N'$ -bis(4-aminopyridine)phenylenediimide in  $\text{CDCl}_3$  at room temperature.

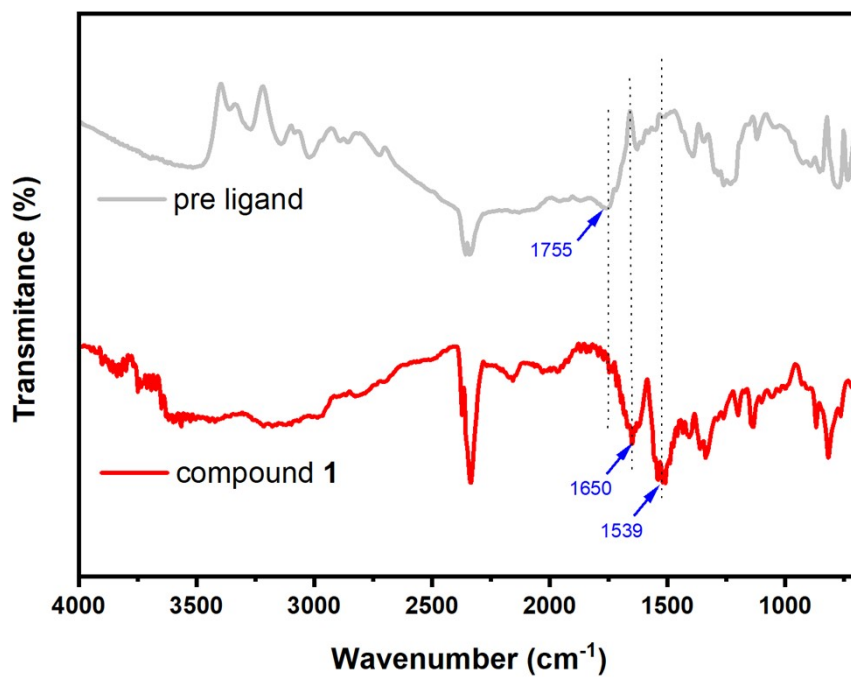

**Figure S2.** IR spectra for compound 1 vs  $N'$ -bis(4-aminopyridine)phenylenediimide.

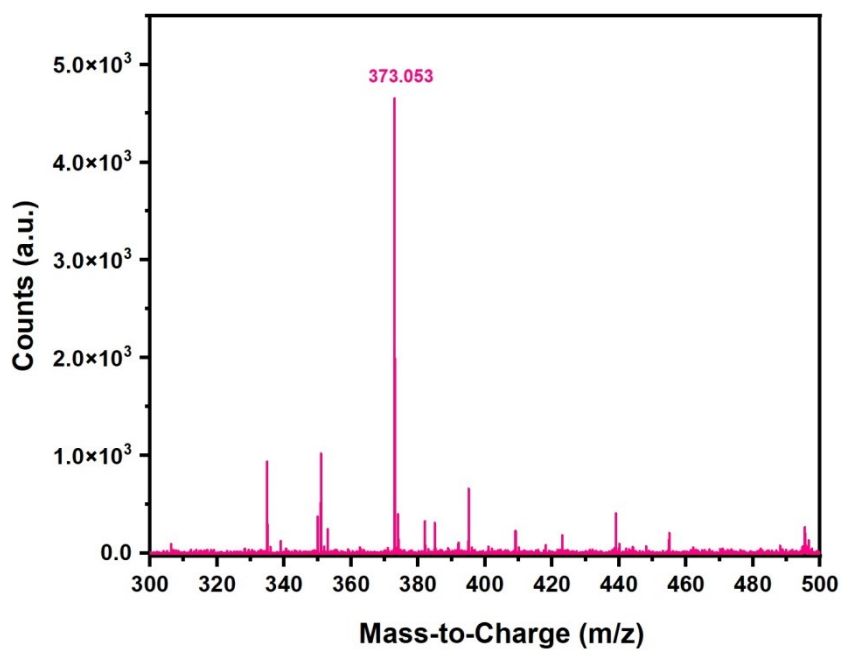

**Figure S3.** ESI-MS data of N'-bis(4-aminopyridine)phenylenediimide.

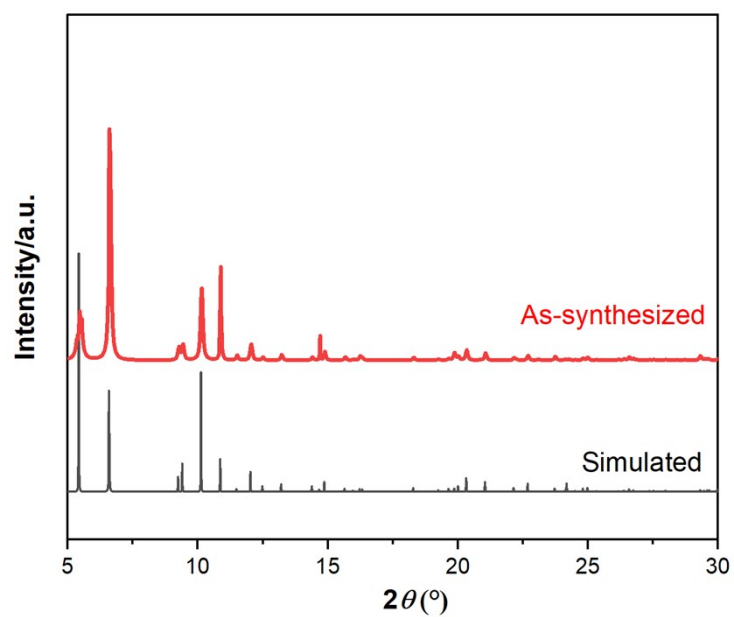

**Figure S4.** Measured and simulated PXRD patterns of compound **1**.

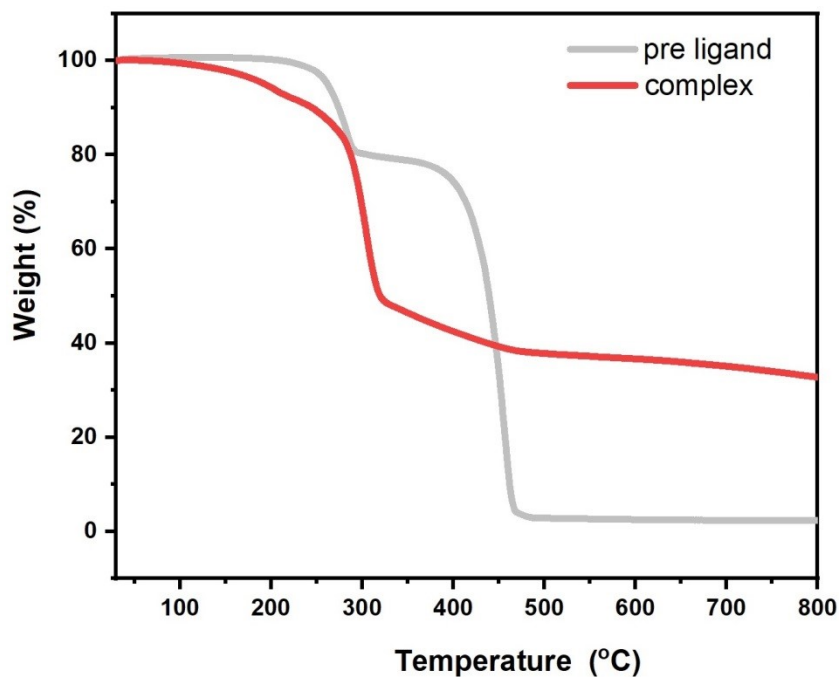

**Figure S5.** TGA traces of **1** (red line) and N'-bis(4-aminopyridine)phenylenediimide (gray line).

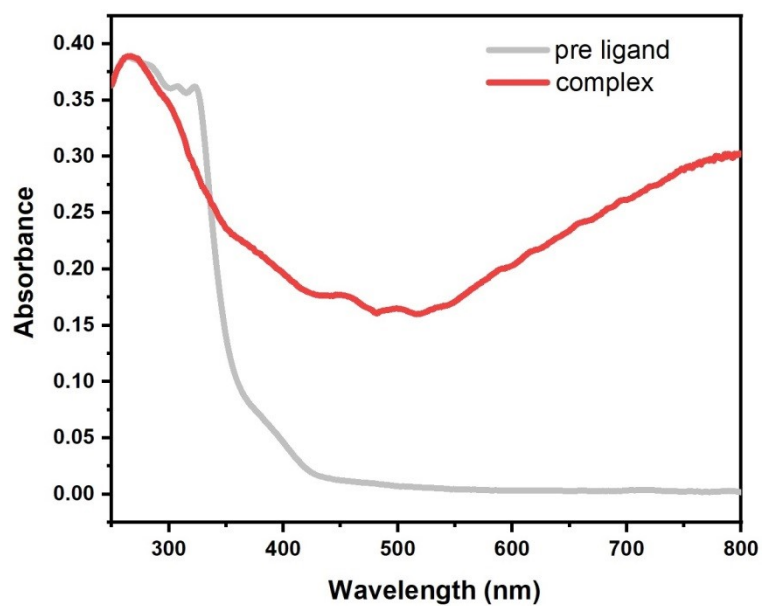

**Figure S6.** Solid state UV-Vis spectra of compound **1** (red line) and N'-bis(4-aminopyridine)phenylenediimide (gray line).

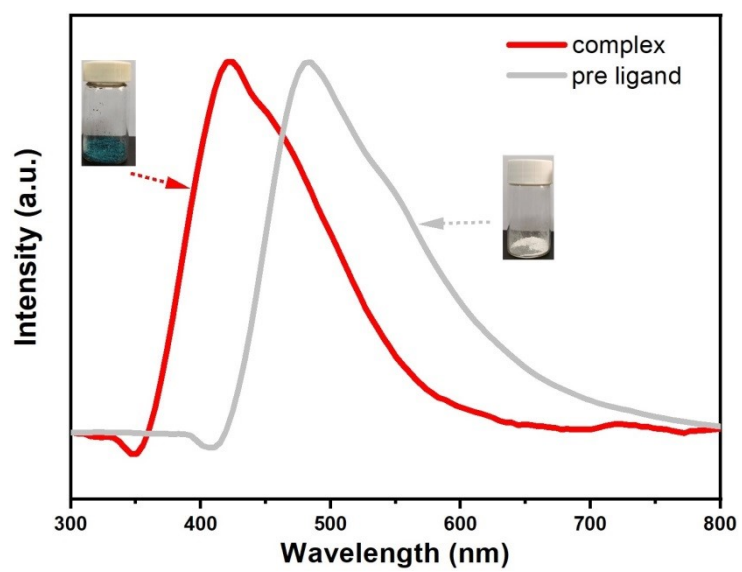

**Figure S7.** Solid-state fluorescent spectra of compound **1** (red line) and N<sup>1</sup>-bis(4-aminopyridine)phenylenediimide (gray line).

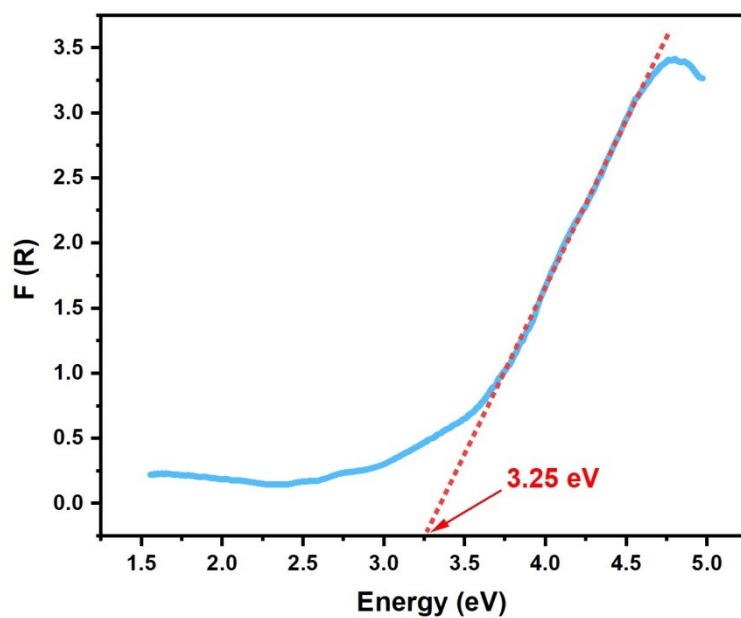

**Figure S8.** Optical diffuse reflectance spectra of compound **1**.

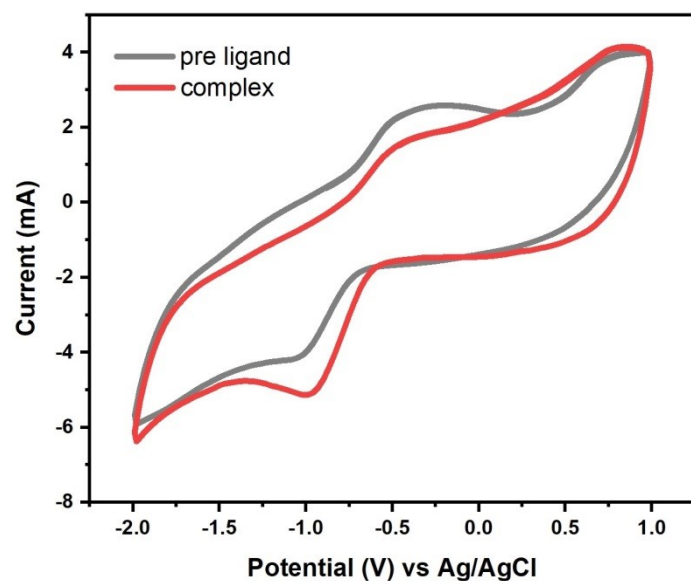

**Figure S9.** The cyclic voltammograms of compound **1** (red line) and N'-bis(4-aminopyridine)phenylenediimide (gray line).

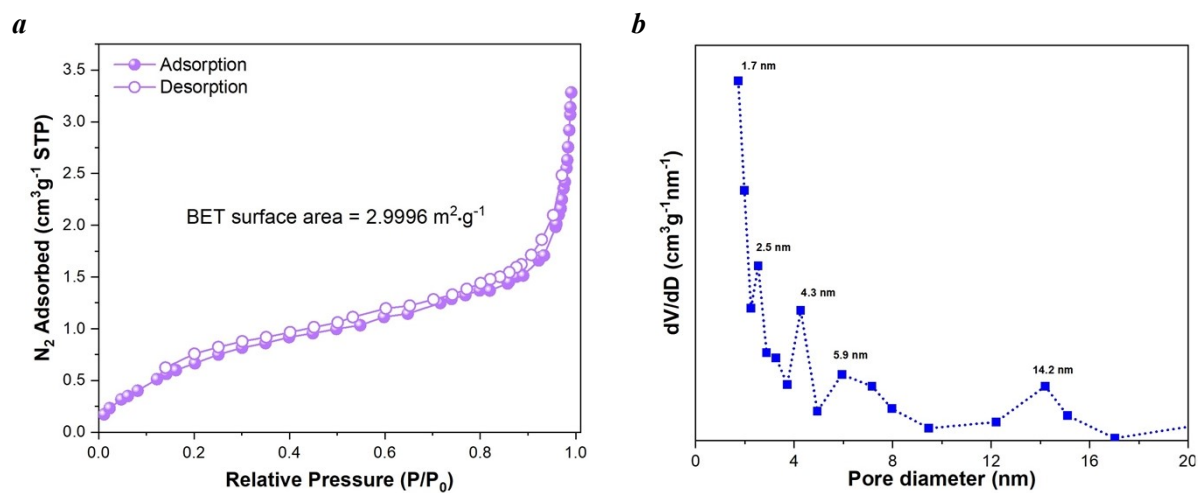

**Figure S10.** The N<sub>2</sub> adsorption-desorption isotherms (a) and porosity feature (b) of **1**.



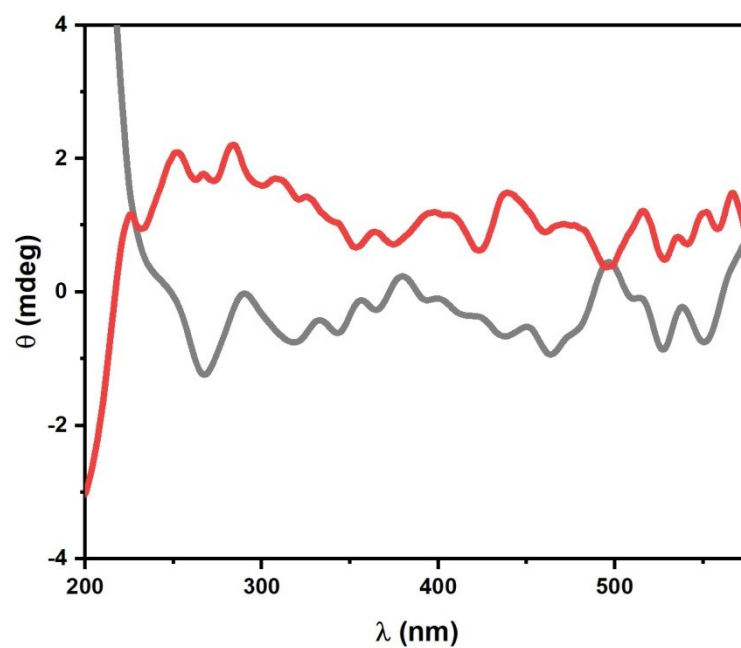

**Figure S11.** Solid-state circular dichroism spectrum of compound **1**.

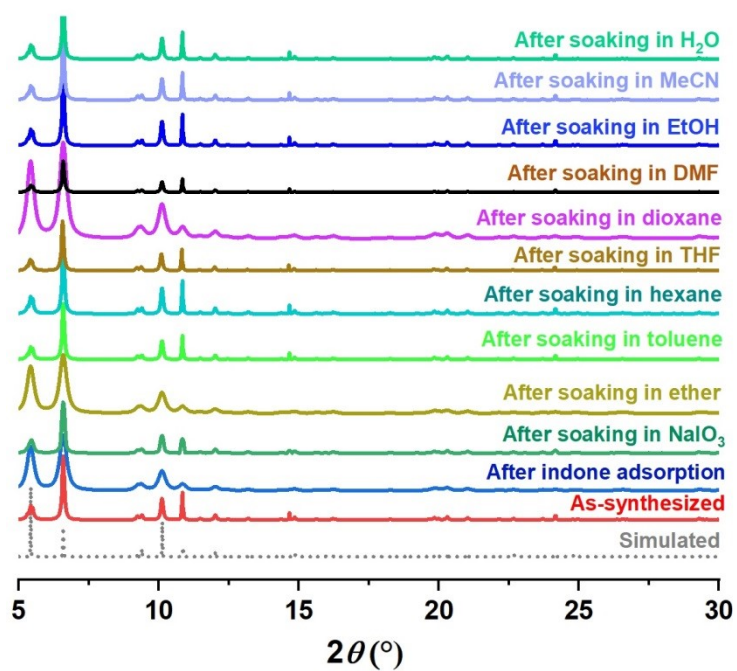

**Figure S12.** PXRD patterns for compound **1** collected after treatment by soaking in various solutions for 1 day or by fumigation in the iodine vapor atmosphere for 1 day.

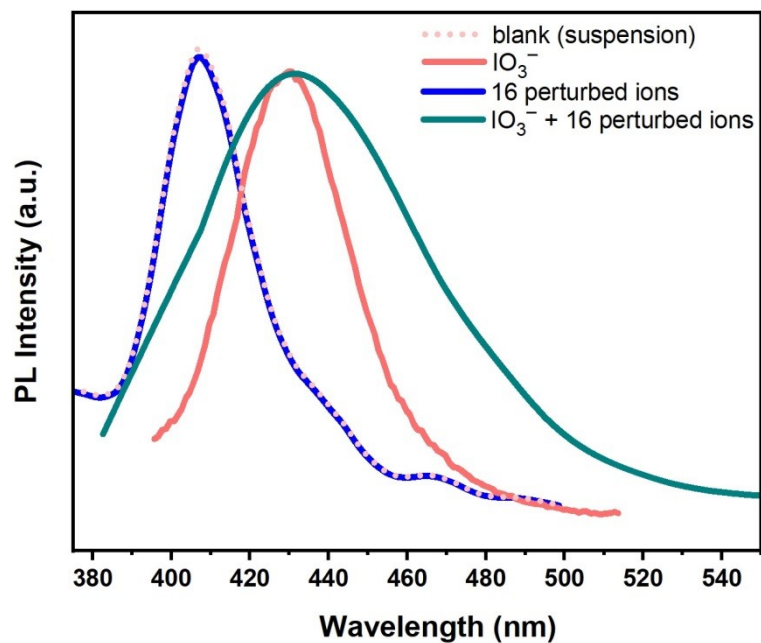

**Figure S13.** Comparison of photoluminescence spectral changes for suspensions of **1** before (light red dotted line) and after treatment by addition of various ions including lone  $\text{IO}_3^-$  anion (red line), 16 mixed perturbed ions ( $\text{Na}^+$ ,  $\text{K}^+$ ,  $\text{Ca}^{2+}$ ,  $\text{Ba}^{2+}$ ,  $\text{Mn}^{2+}$ ,  $\text{Cu}^{2+}$ ,  $\text{Ni}^{2+}$ ,  $\text{Al}^{3+}$ ,  $\text{Ce}^{3+}$  cations, and  $\text{F}^-$ ,  $\text{Cl}^-$ ,  $\text{Br}^-$ ,  $\text{CO}_3^{2-}$ ,  $\text{HCO}_3^-$ ,  $\text{NO}_3^-$ ,  $\text{SO}_3^-$  anions) (blue line), and  $\text{IO}_3^-$  anion plus the above 16 mixed perturbed ions (green line) showing the clearly responsive probe effect for  $\text{IO}_3^-$  anion. Also see legends for each of these.

## References

- (S1) R. J. Marshall; S. L. Griffin; C. Wilson; R. S. Forgan. Stereoselective halogenation of integral unsaturated C-C bonds in chemically and mechanically robust Zr and Hf MOFs. *Chem. Eur. J.* 2016, **22**, 4870–4877.
- (S2) R.-X. Yao; X. Cui; X.-X. Jia; F.-Q. Zhang; X.-M Zhang. A luminescent zinc(II) metal–organic framework (MOF) with conjugated  $\pi$ -electron ligand for high iodine capture and nitro-explosive detection. *Inorg. Chem.* 2016, **55**, 9270–9275.
- (S3) D. F. Sava; K. W. Chapman; M. A. Rodriguez; J. A. Greathouse; P. S. Crozier; H. Zhao; P. J. Chupas; T. M. Nenoff. Competitive I<sub>2</sub> sorption by Cu-BTC from humid gas streams. *Chem. Mater.* 2013, **25**, 2591–2596.
- (S4) G. Brunet; D. A. Safin; M. Z. Aghaji; K. Robeyns; I. Korobkov; T. K. Woo; M. Murugesu. Stepwise crystallographic visualization of dynamic guest binding in a nanoporous framework. *Chem. Sci.* 2017, **8**, 3171–3177.
- (S5) X. Zhang; I. da Silva; H. G. W. Godfrey; S. K. Callear; S. A. Sapchenko; Y. Cheng; I. Vitorica-Yrezabal; M. D. Frogley; G. Cinque; C. C. Tang; C. Giacobbe; C. Dejoie; S. Rudić; A. J. Ramirez-Cuesta; M. A. Denecke; S. Yang; M. Schröder. Confinement of iodine molecules into triple-helical chains within robust metal–organic frameworks. *J. Am. Chem. Soc.* 2017, **139**, 16289–16296.
- (S6) Z. Wang; Y. Huang; J. Yang; Y. Li; Q. Zhuang; J Gu. The water-based synthesis of chemically stable Zr-based MOFs using pyridine-containing ligands and their exceptionally high adsorption capacity for iodine. *Dalton Trans.* 2017, **46**, 7412–7420.
- (S7) D. F. Sava; M. A. Rodriguez; K. W. Chapman; P. J. Chupas; J. A. Greathouse; P. S. Crozier; T. M Nenoff. Capture of volatile iodine, a gaseous fission product, by zeolitic imidazolate framework-8. *J. Am. Chem. Soc.* 2011, **133**, 12398–12401.
- (S8) G. Mehlana; G. Ramon; S. A. Bourne. A 4-fold interpenetrated diamondoid metal-organic framework with large channels exhibiting solvent sorption properties and high iodine capture. *Microporous Mesoporous Mater.* 2016, **231**, 21–30.
- (S9) Y. Chen; L. Li; J. Yang; S. Wang; J. Li. Reversible flexible structural changes in multidimensional MOFs by guest molecules (I<sub>2</sub>, NH<sub>3</sub>) and thermal stimulation. *J. Solid State Chem.* 2015, **226**, 114–119.
- (S10) J. He; J. Duan; H. Shi; J. Huang; J. Huang; L. Yu; M. Zeller; A. D. Hunter; Z. Xu. Immobilization of volatile and corrosive iodine monochloride (ICl) and I<sub>2</sub> reagents in a stable metal–organic framework. *Inorg. Chem.* 2014, **53**, 6837–6843.
- (S11) G. Massasso; J. Long; J. Haines; S. Devautour-Vinot; G. Maurin; A. Grandjean; B. Onida; B. Donnadieu; J. Larionova; C. Guérin; Y. Guari. Iodine capture by Hofmann-type clathrate Ni<sup>II</sup>(pz)[Ni<sup>II</sup>(CN)<sub>4</sub>]. *Inorg. Chem.* 2014, **53**, 4269–4271.
- (S12) Y. Rachuri; K. K. Bisht; E. Suresh. Two-dimensional coordination polymers comprising mixed tripodal ligands for selective colorimetric detection of water and iodine capture. *Cryst. Growth Des.* 2014, **14**, 3300–3308.
- (S13) A. Gładysiak; T. N. Nguyen; M. Spodaryk; J.-H. Lee; J. B. Neaton; A. Züttel; K. C. Stylianou. Incarceration of iodine in a pyrene-based metal–organic framework. *Chem. Eur. J.* 2019, **25**, 501–506.

END
